# Supplementary material for: Scalable manufacturing of flexible and highly conductive Ti3C2Tx/PEDOT:PSS thin films for electromagnetic interference shielding
Source: Royal Society of Chemistry journal article supplement (doi:10.1039/d1nj04513j), 2021-01-01
Supplement: d1nj04513j1.pdf [file d1nj04513j1.pdf]

## Scalable Manufacturing of Flexible and Highly Conductive $\text{Ti}_3\text{C}_2\text{T}_x$ /PEDOT:PSS Thin Films for Electromagnetic Interference Shielding

Supplementary data

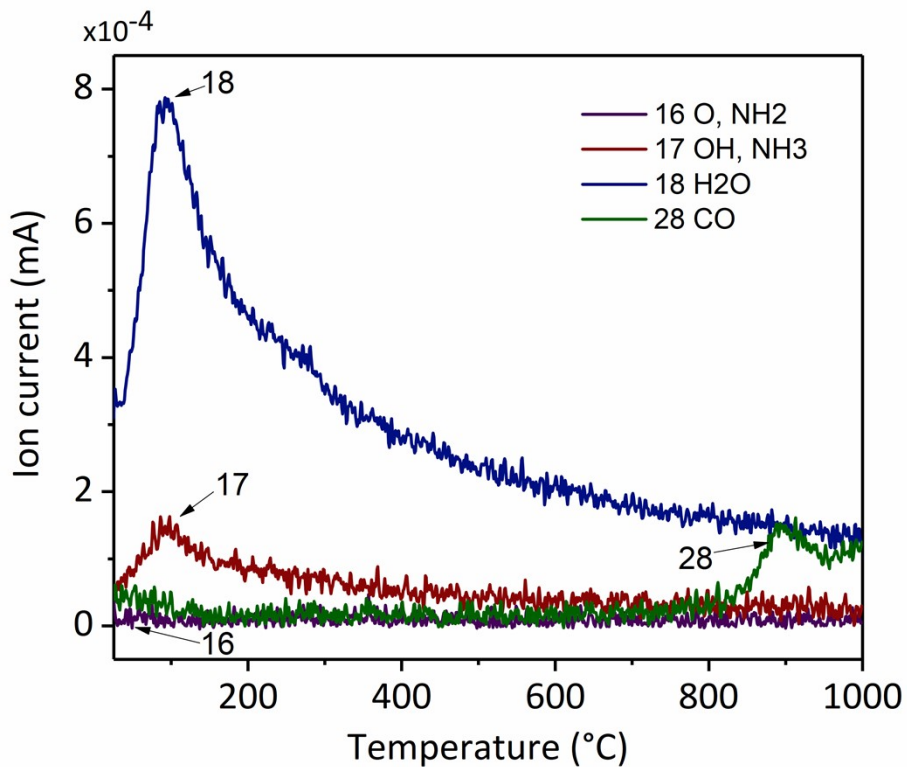

**Figure S1.** Sample mass spectrometry analysis of  $\text{Ti}_3\text{C}_2\text{T}_x$ .

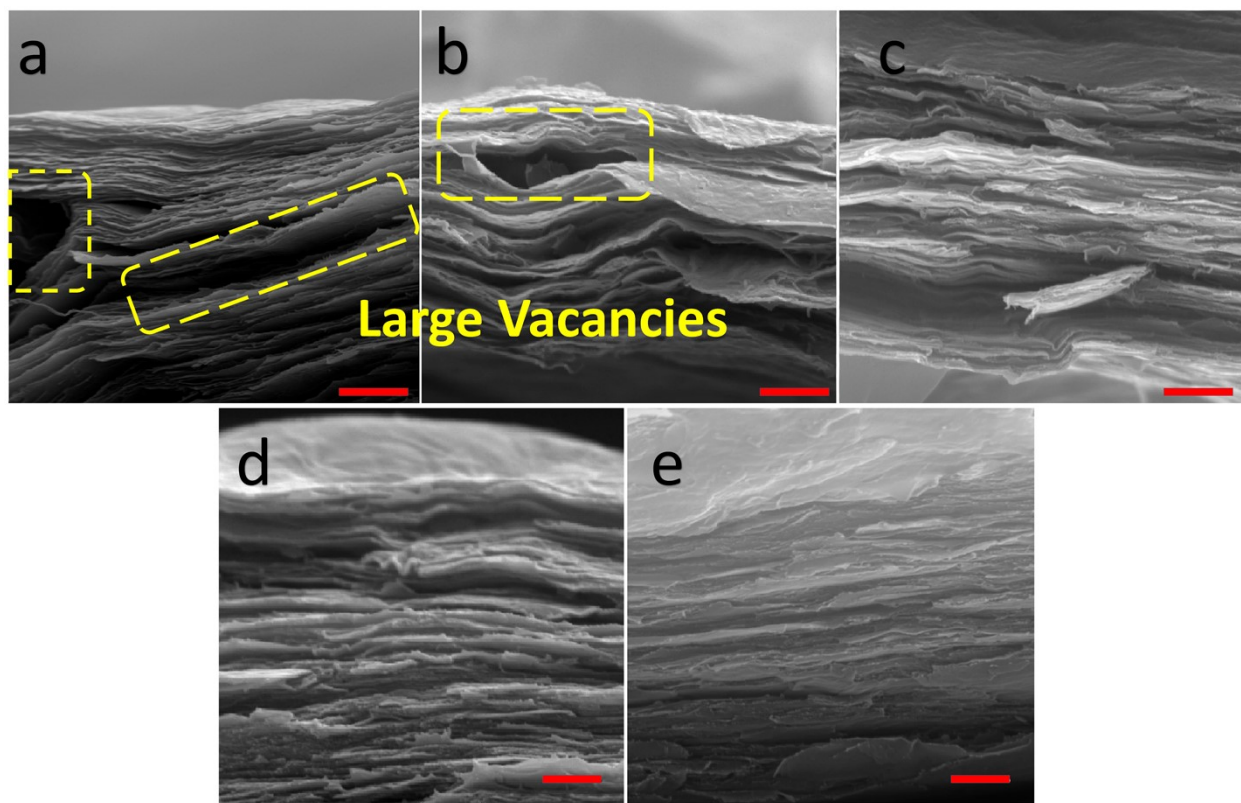

**Figure S2.** Cross-section SEM images of (a) the pristine  $\text{Ti}_3\text{C}_2\text{T}_x$  and  $\text{Ti}_3\text{C}_2\text{T}_x/\text{PEDOT:PSS}$  composite films containing (b) 10, (c) 25, (d) 35, and (e) 50 wt% of the polymer (scale is 2  $\mu\text{m}$ ). The large vacancies shown in Figures S3a-b were observed everywhere in the dried film.

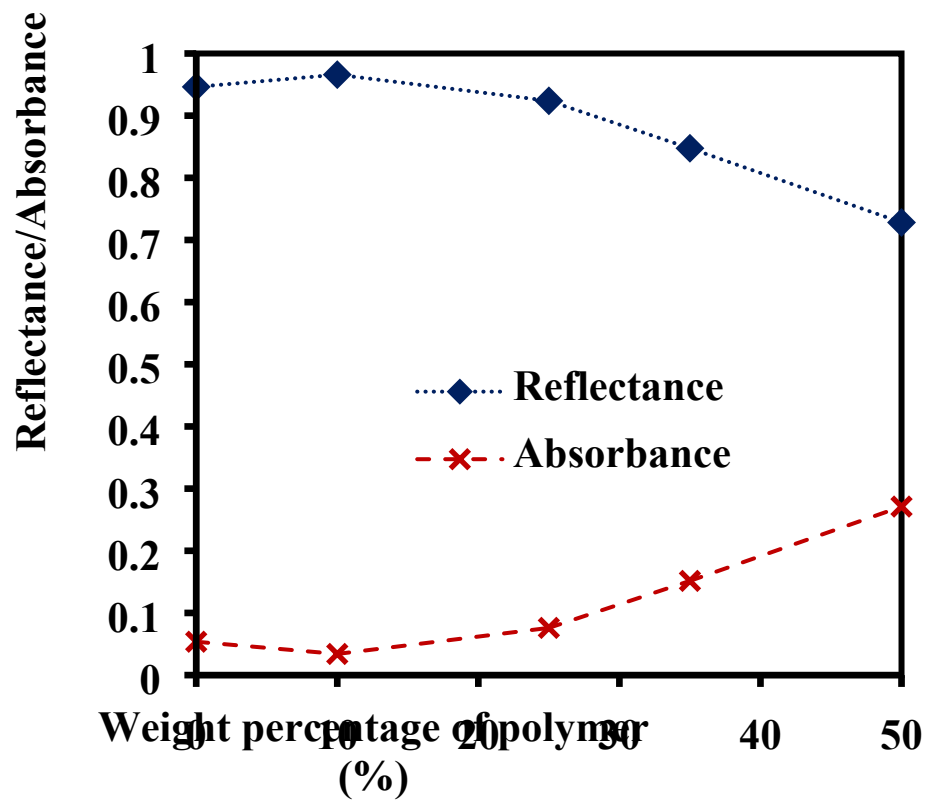

**Figure S3.** Reflectance and absorbance of pristine  $\text{Ti}_3\text{C}_2\text{T}_x$  and the composite films that contained various concentrations of polymer.

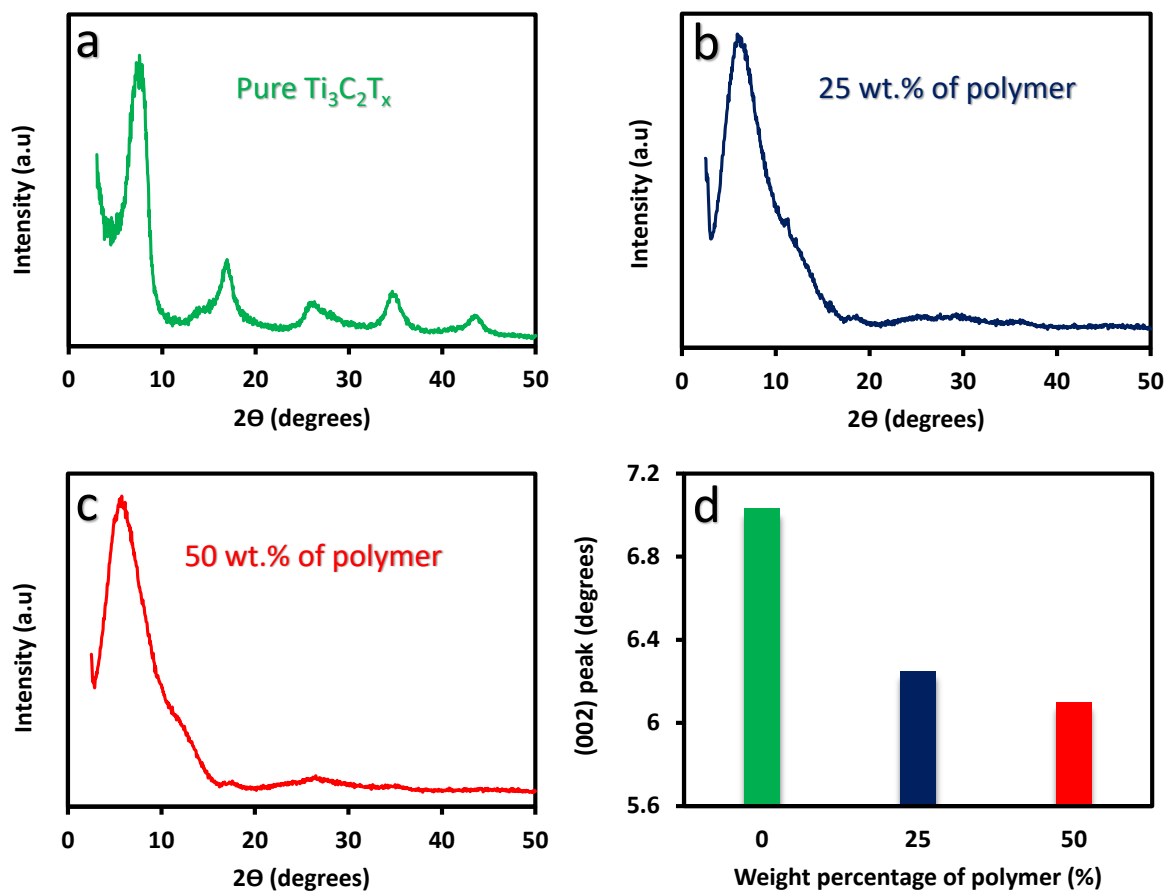

**Figure S4.** XRD patterns of (a) pure  $Ti_3C_2T_x$  and the composite films that contained (b) 25 and (c) 50 wt.% of PEDOT:PSS. (d) Compression between the 002 peaks of the pristine  $Ti_3C_2T_x$  and the composite films that contained various concentrations of polymer.

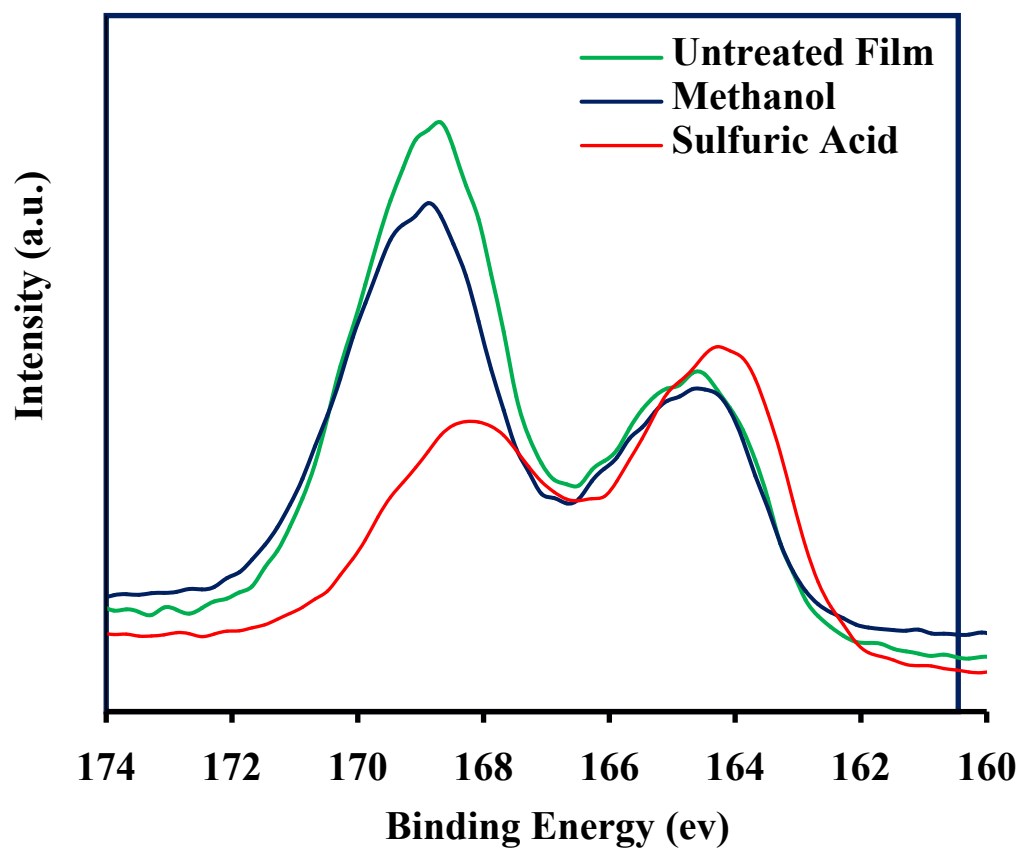

**Figure S5.** XPS results for the composite film containing 25 wt.% of PEDOT:PSS before and after post-treatment with sulfuric acid and methanol.

**Table S1.** Previous studies that used drop-casting or inkjet printing approach for PEDOT:PSS and its composites.

| <b>Material</b>                                                          | <b>Substrate</b>                                                                     | <b>Method</b>   | <b>Reference</b> |
|--------------------------------------------------------------------------|--------------------------------------------------------------------------------------|-----------------|------------------|
| <b>Cu-Bi<sub>0.5</sub>Sb<sub>1.5</sub>Te<sub>3</sub> /PEDOT:PSS</b>      | Silicon dioxide (Activated by plasma)                                                | Drop-casting    | 1                |
| <b>PEDOT:PSS</b>                                                         | Glass (Activated by UV/ozone)                                                        | Drop-casting    | 2                |
| <b>PEDOT:PSS/ethanol, and Graphene dots (GDs)/ PEDOT:PSS/ethanol</b>     | Fluorine-doped SnO <sub>2</sub>                                                      | Drop-casting    | 3                |
| <b>SnSe/PEDOT:PSS/ dimethyl sulfoxide (DMSO)</b>                         | Glass                                                                                | Drop-casting    | 4                |
| <b>PEDOT:PSS coated Te nanorod/ PEDOT:PSS</b>                            | Glass                                                                                | Drop-casting    | 5                |
| <b>Bi<sub>2</sub>Te<sub>3</sub> nanosheet/PEDOT: PSS</b>                 | Glass                                                                                | Drop-casting    | 6                |
| <b>PEDOT: PSS</b>                                                        | Silicon                                                                              | Drop-casting    | 7                |
| <b>PEDOT: PSS</b>                                                        | Glass wafer                                                                          | Drop-casting    | 8                |
| <b>PEDOT: PSS</b>                                                        | Silicon dioxide (Activated by plasma)                                                | Drop-casting    | 9                |
| <b>PEDOT: PSS</b>                                                        | Glass                                                                                | Drop-casting    | 10               |
| <b>DMSO/PEDOT:PSS</b>                                                    | Polydimethylsiloxane (PDMS)                                                          | Drop-casting    | 11               |
| <b>PEDOT:PSS)/waterborne polyurethane (WPU)/ Carbon nanocoils (CNCs)</b> | Glass or elastomeric substrates (Activated by plasma)                                | Drop-casting    | 12               |
| <b>PEDOT:PSS/ single-walled carbon nanotubes (SWCNTs)</b>                | Polyimide                                                                            | Drop-casting    | 13               |
| <b>DMSO/PEDOT:PSS and ethylene glycol (EG)/ PEDOT:PSS</b>                | Polypropylene, glass, and poly(ethyleneterephthalate) (PET)                          | Drop-casting    | 14               |
| <b>PEDOT:PSS/SWCNTs/ DMSO</b>                                            | Glass                                                                                | Drop-casting    | 15               |
| <b>Bi<sub>2</sub>Te<sub>3</sub> nanosheet/PEDOT: PSS</b>                 | Glass                                                                                | Drop-casting    | 16               |
| <b>Cellulose/PEDOT:PSS/DMSO/glycerol</b>                                 | Glass                                                                                | Drop-casting    | 17               |
| <b>PEDOT: PSS</b>                                                        | Glass                                                                                | Drop-casting    | 18               |
| <b>PEDOT: PSS/DMSO</b>                                                   | Glass (Activated by aqua regia)                                                      | Drop-casting    | 19               |
| <b>Graphene oxide (GO)/PEDOT:PSS/DMSO</b>                                | Glass (Activated with a mixture of concentrated sulfuric acid and hydrogen peroxide) | Drop-casting    | 20               |
| <b>PEDOT:PSS/ CNTs</b>                                                   | Polyimide                                                                            | Drop-casting    | 21               |
| <b>PEDOT: PSS/DMSO</b>                                                   | Glass                                                                                | Drop-casting    | 22               |
| <b>PEDOT: PSS</b>                                                        | Glass                                                                                | Drop-casting    | 23               |
| <b>Ag<sub>2</sub>Se NW/PEDOT:PSS</b>                                     | Glass                                                                                | Drop-casting    | 24               |
| <b>PEDOT:PSS/ GDs</b>                                                    | Fluorine-doped SnO <sub>2</sub>                                                      | Drop-casting    | 25               |
| <b>PEDOT-PSS/SWCNTs</b>                                                  | PET                                                                                  | Inkjet printing | 26               |
| <b>PEDOT-PSS/vegetal glycerol</b>                                        | Polyimide                                                                            | Inkjet printing | 27               |
| <b>PEDOT:PSS/DMSO</b>                                                    | Pre-treated polyethylene naphthalate                                                 | Inkjet printing | 28               |
| <b>PEDOT:PSS</b>                                                         | Polyimide (Activated by plasma)                                                      | Inkjet printing | 29               |
| <b>PEDOT:PSS</b>                                                         | PET                                                                                  | Inkjet printing | 30               |
| <b>PEDOT-PSS/ ethanol/ diethylene glycol</b>                             | Polyimide (Activated by plasma)                                                      | Inkjet printing | 31               |

**Table S2.** Average static, advancing, and receding contact angles of water on the polycarbonate sheet.

|                            | Average static contact angle | Average advancing contact angle | Average receding contact angle |
|----------------------------|------------------------------|---------------------------------|--------------------------------|
| Before treatment           | 81.6                         | 89.2                            | 69.6                           |
| After treatment for 30 min | 24.2                         | 28.6                            | 19.9                           |

**Table S3.** Average static, advancing, and receding contact angles of the aqueous solution of  $Ti_3C_2T_x$  or  $Ti_3C_2T_x$ /PEDOT:PSS (25 wt. %) on activated polycarbonate sheet.

|                                   | Average static contact angle | Average advancing contact angle | Average receding contact angle |
|-----------------------------------|------------------------------|---------------------------------|--------------------------------|
| $Ti_3C_2T_x$                      | 17.3                         | 21.1                            | 14.2                           |
| $Ti_3C_2T_x$ /PEDOT:PSS (25 wt.%) | 15.9                         | 19.3                            | 0                              |

**Table S4.** Previous studies of thickness, conductivity,  $SE_T$ , and specific EMI shielding effectiveness of various nanocomposites.

| Material                                                  | Thickness (mm) | Conductivity ( $\sigma$ $cm^{-1}$ ) | $SE_T$ (dB) | $SE_T$ /Density/thickness (dB $cm^2 g^{-1}$ ) | Reference |
|-----------------------------------------------------------|----------------|-------------------------------------|-------------|-----------------------------------------------|-----------|
| $Ti_3C_2T_x$ /PEDOT:PSS                                   | 0.011          | 340.5                               | 42.1        | 19498                                         | 32        |
| $Ti_2CT_x$ /Polyvinyl alcohol (PVA)                       | 0.1            | $2.0 \times 10^{-4}$                | 26          | 5136                                          | 33        |
| $Ti_3C_2T_x$ /Cellulose nanofiber (CNF)                   | 0.035          | 1.43                                | 39.6        | 7029                                          | 34        |
| $Ti_3C_2T_x$ /Silver nanowires (AgNW)/ Nanocellulose (NC) | 0.0169         | 300                                 | 42.74       | 16724                                         | 35        |
| $Ti_3C_2T_x$ /Aramid nanofibers (ANF)                     | 0.012          | -                                   | 34.71       | 21971                                         | 36        |
| $Ti_3C_2T_x$ /PVA                                         | 0.027          | 7.16                                | 44.4        | 9343                                          | 37        |
| Polystyrene/Graphene                                      | 2.5            | 1.25                                | 29          | 322                                           | 38        |
| Poly(3-hydroxybutyrate-co-3-hydroxyvalerate) (PHBV)/ AgNW | 0.018          | -                                   | 45.9        | 19678                                         | 39        |
| $Ti_3C_2T_x$ /Polyacrylonitrile (PAN)/ $TiO_2$            | 0.045          | 92.68                               | 32          | 4085                                          | 40        |
| $Ti_3C_2T_x$ /rGO/Epoxy                                   | 2              | 6.95                                | 56.4        | 9400                                          | 41        |
| Graphene/PEDOT:PSS                                        | 0.8            | 6.84                                | 70          | 841                                           | 42        |
| $V_2O_5$ /Polyaniline (PANI)                              | 6              | 0.016                               | 34.7        | 2770.3                                        | 43        |
| $Ti_3C_2T_x$ /AgNW/CNF                                    | 0.035          | 373.78                              | 59.7        | 10647                                         | 44        |
| $Ti_3C_2T_x$ /Xanthan                                     | 0.00684        | 115.29                              | 34.1        | 14,490                                        | 45        |
| Poly vinylidene fluoride (PVDF)/MWCNT                     | 0.9            | 0.074                               | 32          | 259                                           | 46        |
| Graphene/ PMMA                                            | 0.24           | 3.11                                | 19          | 1042                                          | 47        |

|                                                           |       |            |       |       |           |
|-----------------------------------------------------------|-------|------------|-------|-------|-----------|
| <b>Ti<sub>3</sub>C<sub>2</sub>T<sub>x</sub>/PANI</b>      | 0.376 | 3.25       | 35.3  | 1700  | 48        |
| <b>Poly(oxymethylene) (POM)/<br/>MWCNT</b>                | 2     | 3.33       | 58.6  | 344.4 | 49        |
| <b>Ti<sub>3</sub>C<sub>2</sub>T<sub>x</sub>/CNF</b>       | 0.047 | 7.39       | 24    | 2647  | 50        |
| <b>MWCNT/Polycarbonate</b>                                | 2.16  | 3          | 39    | 164   | 51        |
| <b>Ti<sub>3</sub>C<sub>2</sub>T<sub>x</sub>/PEDOT:PSS</b> | 0.007 | 2900 ± 400 | 55.42 | 38079 | This work |

**Table S5.** Compositions of the Ti<sub>3</sub>C<sub>2</sub>T<sub>x</sub> MXene and Ti<sub>3</sub>C<sub>2</sub>T<sub>x</sub> MXene/PEDOT:PSS solutions used for drop-casting. One mL of each of the solutions was used for covering 9 cm<sup>2</sup> of polycarbonate sheet.

| <b>Sample name</b>                                   | <b>PEDOT:PSS content (mg)</b> | <b>Ti<sub>3</sub>C<sub>2</sub>T<sub>x</sub> MXene content (mg)</b> | <b>Water content (mL)</b> |
|------------------------------------------------------|-------------------------------|--------------------------------------------------------------------|---------------------------|
| <b>Pure Ti<sub>3</sub>C<sub>2</sub>T<sub>x</sub></b> | -                             | 15                                                                 | 1                         |
| <b>10 wt.%</b>                                       | 1.5                           | 13.5                                                               |                           |
| <b>25 wt.%</b>                                       | 3.75                          | 11.25                                                              |                           |
| <b>35 wt.%</b>                                       | 5.25                          | 9.75                                                               |                           |
| <b>50 wt.%</b>                                       | 7.5                           | 7.5                                                                |                           |



## Equations

1. The EMI reflection loss is calculated using:

$$SE_R = 168 + 10 \log \left( \frac{\sigma}{\mu f} \right) = 10 \log \left( \frac{1}{1-R} \right) \quad (S1)$$

where  $\sigma$  is the conductivity,  $\mu$  is the magnetic permeability of the shield relative to air, and  $f$  is the frequency in Hz and  $R$  is the reflectance.

2. The EMI absorption loss:

$$SE_A = 8.68t \left( \sqrt{\frac{\sigma \omega \mu}{2}} \right) = 8.68 \frac{t}{\delta} = 10 \log \left( \frac{1-R}{T} \right) \quad (S2)$$

where  $t$  is the thickness of the shield,  $\omega$  is the angular frequency in rad/s,  $\delta$  is the skin depth of the shield, and  $T$  is the transmittance.

3. Reflectance ( $R$ ):

$$R = S_{11}^2 \quad (S3)$$

where  $S_{11}$  is the reflected voltage magnitude divided by the incident voltage magnitude in port 1.

4. Transmittance ( $T$ ):

$$T = S_{21}^2 \quad (S4)$$

where  $S_{21}$  is the transmitted voltage magnitude from port 1 to port 2 divided by the incident voltage magnitude in port 1.

5. Absorbance ( $A$ ):

$$A = 1 - R - T \quad (S5)$$

## References

1. Y. Wang, M. Hong, W.-D. Liu, X.-L. Shi, S.-D. Xu, Q. Sun, H. Gao, S. Lu, J. Zou and Z.-G. Chen, *Chem. Eng. J.*, 2020, **397**, 125360.
2. T. A. Yemata, A. K. K. Kyaw, Y. Zheng, X. Wang, Q. Zhu, W. S. Chin and J. Xu, *Polym. Int.*, 2020, **69**, 84-92.
3. C.-P. Lee, K.-Y. Lai, C.-A. Lin, C.-T. Li, K.-C. Ho, C.-I. Wu, S.-P. Lau and J.-H. He, *Nano Energy*, 2017, **36**, 260-267.
4. H. Ju and J. Kim, *Chem. Eng. J.*, 2016, **297**, 66-73.
5. Q. Meng, Q. Jiang, K. Cai and L. Chen, *Org. Electron.*, 2019, **64**, 79-85.
6. Y. Du, K. Cai, S. Chen, P. Cizek and T. Lin, *ACS Appl. Mater. Interfaces.*, 2014, **6**, 5735-5743.
7. Y. Honma, K. Itoh, H. Masunaga, A. Fujiwara, T. Nishizaki, S. Iguchi and T. Sasaki, *Adv. Electron. Mater.*, 2018, **4**, 1700490.
8. P. Stadler, D. Farka, H. Coskun, E. D. Głowacki, C. Yumusak, L. M. Uiberlacker, S. Hild, L. N. Leonat, M. C. Scharber and P. Klapetek, *J. Mater. Chem. C.*, 2016, **4**, 6982-6987.
9. S. Xu, M. Hong, X.-L. Shi, Y. Wang, L. Ge, Y. Bai, L. Wang, M. Dargusch, J. Zou and Z.-G. Chen, *Chem. Mater.*, 2019, **31**, 5238-5244.
10. N. Massonnet, A. Carella, O. Jaudouin, P. Rannou, G. Laval, C. Celle and J.-P. Simonato, *J. Mater. Chem. C.*, 2014, **2**, 1278-1283.
11. J. Liu, X. Wang, D. Li, N. E. Coates, R. A. Segalman and D. G. Cahill, *Macromolecules*, 2015, **48**, 585-591.
12. S. Xu, Z. Fan, S. Yang, Y. Zhao and L. Pan, *Chem. Eng. J.*, 2021, **404**, 126064.
13. S.-H. Chung, D. H. Kim, H. Kim, H. Kim and S. W. Jeong, *Mater. Today Commun.*, 2020, **23**, 100867.
14. C. Liu, B. Lu, J. Yan, J. Xu, R. Yue, Z. Zhu, S. Zhou, X. Hu, Z. Zhang and P. Chen, *Synth. Met.*, 2010, **160**, 2481-2485.
15. S. Liu, H. Li and C. He, *Carbon*, 2019, **149**, 25-32.
16. H. Song, C. Liu, H. Zhu, F. Kong, B. Lu, J. Xu, J. Wang and F. Zhao, *Journal of electronic materials*, 2013, **42**, 1268-1274.
17. D. Belaineh, J. W. Andreasen, J. Palisaitis, A. Malti, K. Håkansson, L. Wagberg, X. Crispin, I. Engquist and M. Berggren, *ACS Applied Polymer Materials*, 2019, **1**, 2342-2351.
18. T. A. Yemata, Y. Zheng, A. K. K. Kyaw, X. Wang, J. Song, W. S. Chin and J. Xu, *Org. Electron.*, 2020, **81**, 105682.
19. Q. Zhu, E. Yildirim, X. Wang, X. Y. D. Soo, Y. Zheng, T. L. Tan, G. Wu, S.-W. Yang and J. Xu, *Frontiers in chemistry*, 2019, **7**, 783.
20. F. Li, K. Cai, S. Shen and S. Chen, *Synth. Met.*, 2014, **197**, 58-61.
21. W. Lee, Y. H. Kang, J. Y. Lee, K.-S. Jang and S. Y. Cho, *RSC Adv.*, 2016, **6**, 53339-53344.
22. L. Ouyang, C. Musumeci, M. J. Jafari, T. Ederth and O. Inganäs, *ACS Appl. Mater. Interfaces.*, 2015, **7**, 19764-19773.
23. S. Zhang and F. Cicoira, *Adv. Mater.*, 2017, **29**, 1703098.
24. D. Park, M. Kim and J. Kim, *Polymers*, 2021, **13**, 210.
25. C.-P. Lee, C.-A. Lin, T.-C. Wei, M.-L. Tsai, Y. Meng, C.-T. Li, K.-C. Ho, C.-I. Wu, S.-P. Lau and J.-H. He, *Nano Energy*, 2015, **18**, 109-117.
26. A. Denneulin, J. Bras, F. Carcone, C. Neuman and A. Blayo, *Carbon*, 2011, **49**, 2603-2614.
27. L. D. Garma, L. M. Ferrari, P. Scognamiglio, F. Greco and F. Santoro, *Lab on a Chip*, 2019, **19**, 3776-3786.

28. C. Bali, A. Brandlmaier, A. Ganster, O. Raab, J. Zapf and A. Hübler, *Materials Today: Proceedings*, 2016, **3**, 739-745.
29. M. Borghetti, M. Serpelloni, E. Sardini and S. Pandini, *Sensors and Actuators A: Physical*, 2016, **243**, 71-80.
30. A. Rivadeneyra, M. Bobinger, A. Albrecht, M. Becherer, P. Lugli, A. Falco and J. F. Salmerón, *Polymers*, 2019, **11**, 824.
31. M. Borghetti, M. Ghittorelli, E. Sardini, M. Serpelloni and F. Torricelli, *IEEE Transactions on Instrumentation and Measurement*, 2016, **65**, 2137-2144.
32. R. Liu, M. Miao, Y. Li, J. Zhang, S. Cao and X. Feng, *ACS Appl. Mater. Interfaces.*, 2018, **10**, 44787-44795.
33. H. Xu, X. Yin, X. Li, M. Li, S. Liang, L. Zhang and L. Cheng, *ACS Appl. Mater. Interfaces.*, 2019, **11**, 10198-10207.
34. B. Zhou, Z. Zhang, Y. Li, G. Han, Y. Feng, B. Wang, D. Zhang, J. Ma and C. Liu, *ACS Appl. Mater. Interfaces.*, 2020, **12**, 4895-4905.
35. M. Miao, R. Liu, S. Thaiboonrod, L. Shi, S. Cao, J. Zhang, J. Fang and X. Feng, *J. Mater. Chem. C.*, 2020, **8**, 3120-3126.
36. H. Wei, M. Wang, W. Zheng, Z. Jiang and Y. Huang, *Ceram. Int.*, 2020, **46**, 6199-6204.
37. X. Jin, J. Wang, L. Dai, X. Liu, L. Li, Y. Yang, Y. Cao, W. Wang, H. Wu and S. Guo, *Chem. Eng. J.*, 2020, **380**, 122475.
38. D.-X. Yan, P.-G. Ren, H. Pang, Q. Fu, M.-B. Yang and Z.-M. Li, *J. Mater. Chem.*, 2012, **22**, 18772-18774.
39. S. Yang, Y.-Y. Wang, Y. Song, L.-C. Jia, G.-J. Zhong, L. Xu, D.-X. Yan, J. Lei and Z.-M. Li, *J. Mater. Chem. C.*, 2021.
40. Y. Wang, H.-K. Peng, T.-T. Li, B.-C. Shiu, H.-T. Ren, X. Zhang, C.-W. Lou and J.-H. Lin, *Chem. Eng. J.*, 2021, 128681.
41. S. Zhao, H.-B. Zhang, J.-Q. Luo, Q.-W. Wang, B. Xu, S. Hong and Z.-Z. Yu, *ACS nano*, 2018, **12**, 11193-11202.
42. N. Agnihotri, K. Chakrabarti and A. De, *RSC Adv.*, 2015, **5**, 43765-43771.
43. A. P. Narayanan, K. N. Unni and K. P. Surendran, *Chem. Eng. J.*, 2021, **408**, 127239.
44. B. Zhou, Q. Li, P. Xu, Y. Feng, J. Ma, C. Liu and C. Shen, *Nanoscale*, 2021, **13**, 2378-2388.
45. Y. Sun, R. Ding, S. Y. Hong, J. Lee, Y.-K. Seo, J.-D. Nam and J. Suhr, *Chem. Eng. J.*, 2021, **410**, 128348.
46. B. Bhaskara Rao, N. Kale, B. Kothavale and S. Kale, *AIP Advances*, 2016, **6**, 065107.
47. H.-B. Zhang, Q. Yan, W.-G. Zheng, Z. He and Z.-Z. Yu, *ACS Appl. Mater. Interfaces.*, 2011, **3**, 918-924.
48. G. Yin, Y. Wang, W. Wang, Z. Qu and D. Yu, *Adv. Mater. Interfaces.*, 2021, 2001893.
49. J. Li, J.-L. Chen, X.-H. Tang, J.-H. Cai, J.-H. Liu and M. Wang, *J. Colloid Interface Sci.*, 2020, **565**, 536-545.
50. W.-T. Cao, F.-F. Chen, Y.-J. Zhu, Y.-G. Zhang, Y.-Y. Jiang, M.-G. Ma and F. Chen, *Acs Nano*, 2018, **12**, 4583-4593.
51. S. Pande, A. Chaudhary, D. Patel, B. P. Singh and R. B. Mathur, *RSC Adv.*, 2014, **4**, 13839-13849.
